# Supplementary material for: Comprehensive Multiplex One-Step Real-Time TaqMan qRT-PCR Assays for Detection and Quantification of Hemorrhagic Fever Viruses
Source: PubMed Central journal article supplement (PMC3994070; doi:10.1371/journal.pone.0095635), 2014-04-21
Supplement: pone.0095635.s001.pdf [file pone.0095635.s001.pdf]

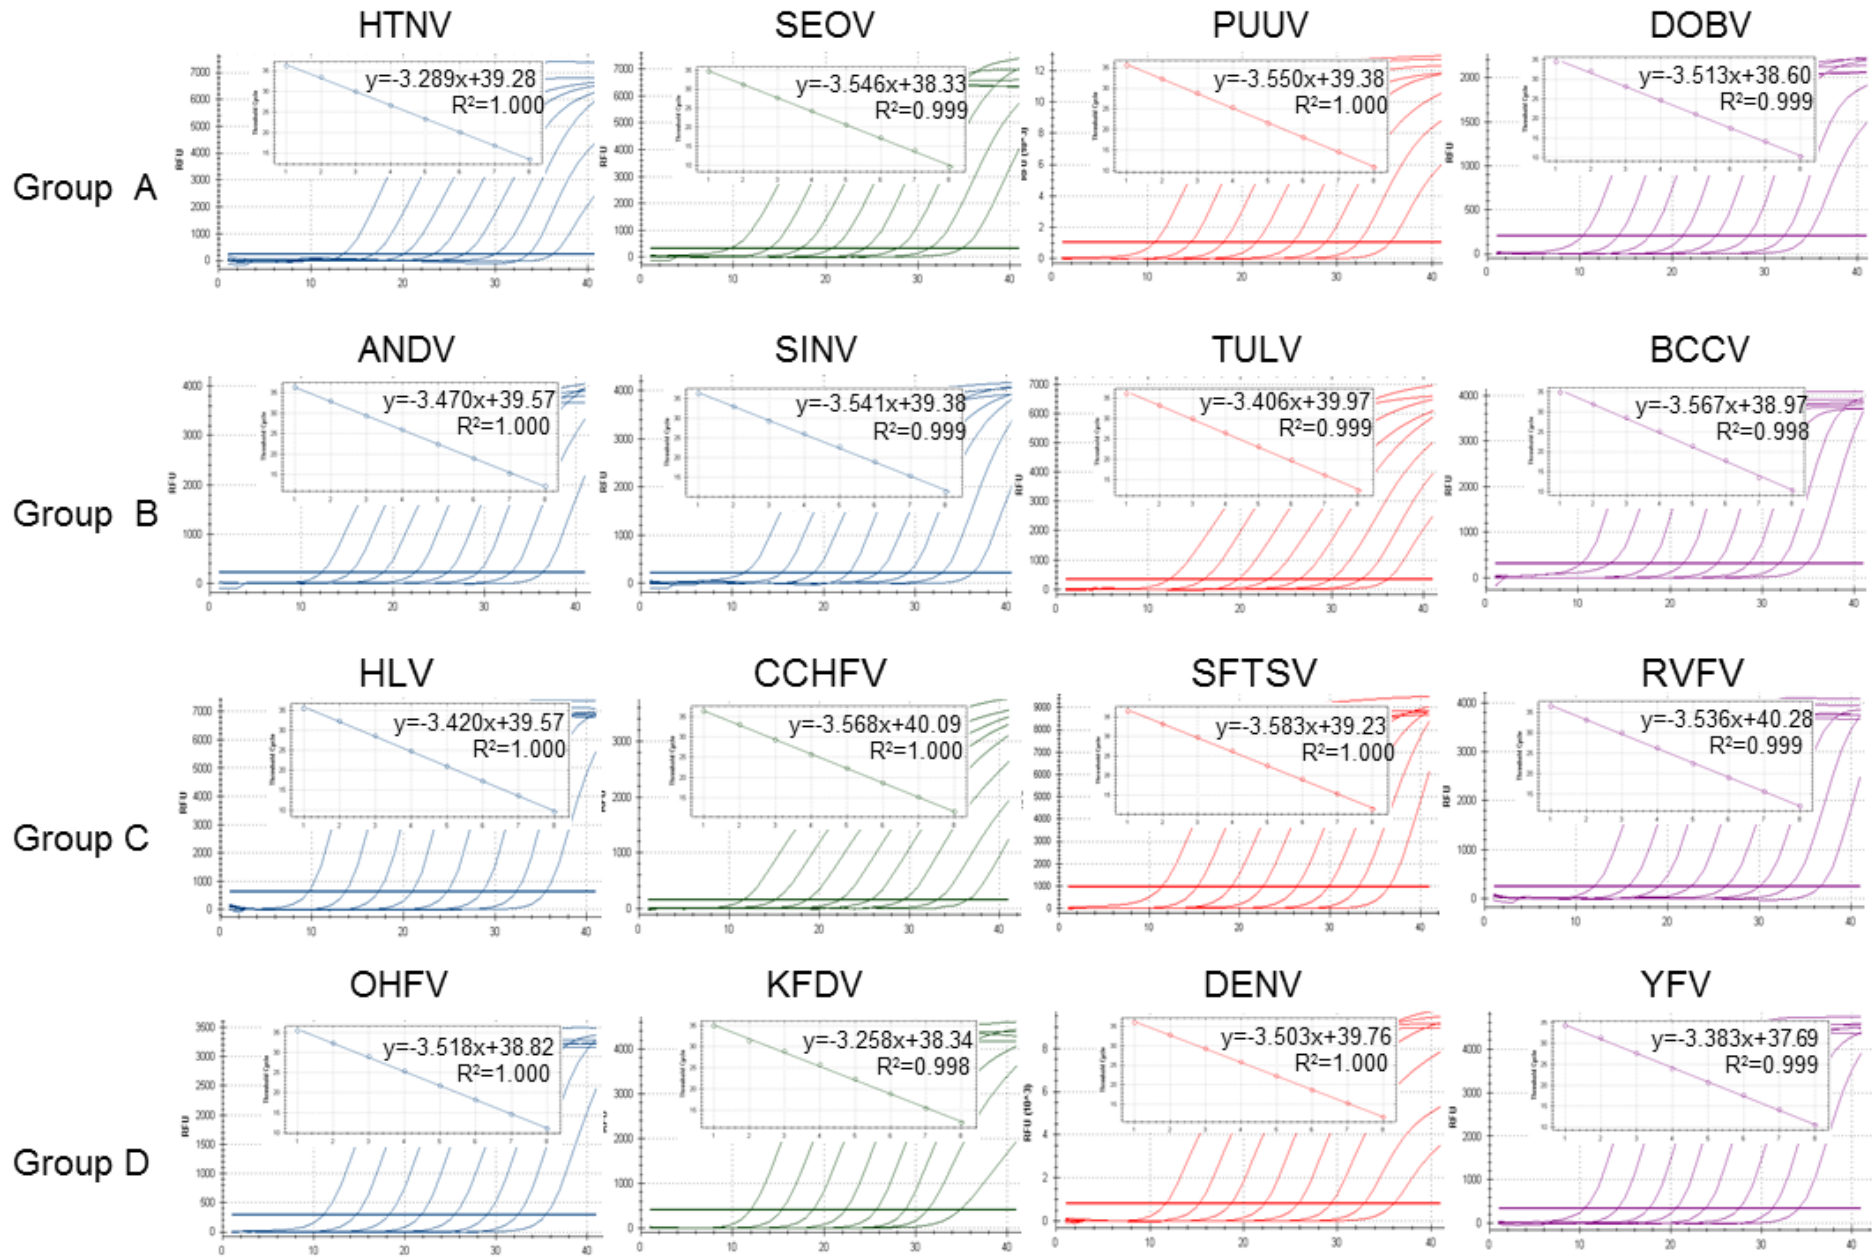

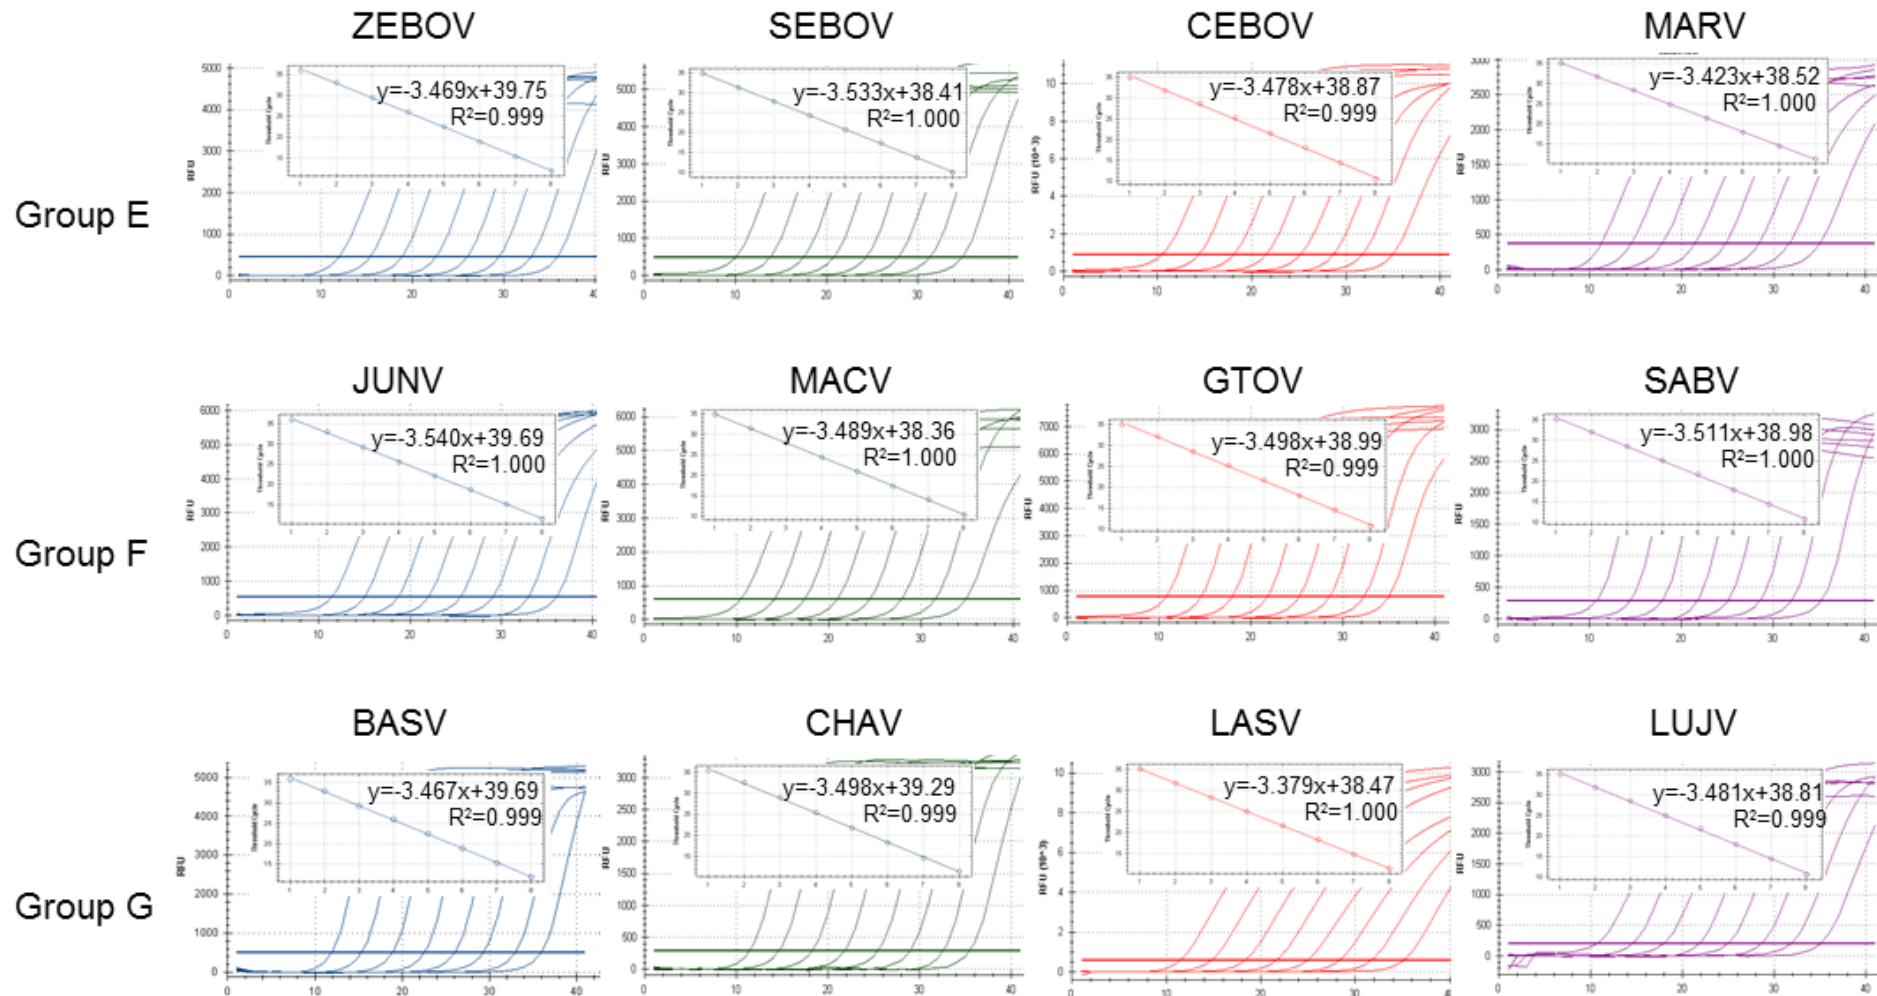

**Figure S1. Amplification plots and standard curves of monoplex one-step real-time TaqMan RT-PCR assays.**

The monoplex one-step real-time TaqMan RT-PCR assays were performed with synthesized in vitro target viral RNA transcripts ranging from  $10^1$  to  $10^8$  copies /  $\mu\text{L}$  to evaluate the specificity and the sensitivity of each primers/probe set. A PCR baseline subtractive curve fit view of the data is shown with relative fluorescence units (RFUs) plotted against cycle numbers. Standard curves generated from the Ct values obtained against known concentrations, the coefficient of determination ( $R^2$ ) and slope of the regression curve for each assay are indicated.
