# Supplementary material for: Comprehensive Multiplex One-Step Real-Time TaqMan qRT-PCR Assays for Detection and Quantification of Hemorrhagic Fever Viruses
Source: PubMed Central journal article supplement (PMC3994070; doi:10.1371/journal.pone.0095635), 2014-04-21
Supplement: pone.0095635.s003.pdf [file pone.0095635.s003.pdf]

**Table S2. Viral RNA standards prepared via *in vitro* transcription**

| <b>Virus</b>                                      | <b>Source</b>      | <b>GenBank accession number of the referenced sequence</b> | <b>Length (nt)</b> | <b>Concentration (ng/<math>\mu</math>L)</b> | <b>Copy number (copies/<math>\mu</math>L)</b> |
|---------------------------------------------------|--------------------|------------------------------------------------------------|--------------------|---------------------------------------------|-----------------------------------------------|
| Hantaan virus                                     | Virus isolate      | AY017064.1                                                 | 1290               | 820                                         | 1.125E12                                      |
| Seoul virus                                       | Virus isolate      | AF288299.1                                                 | 1290               | 600                                         | 8.235E11                                      |
| Puumala virus                                     | Chemical synthesis | NC_005224                                                  | 1302               | 814                                         | 1.107E12                                      |
| Dobrava virus                                     | Chemical synthesis | NC_005233                                                  | 1290               | 792                                         | 1.087E12                                      |
| Tula virus                                        | Chemical synthesis | NC_005227                                                  | 1290               | 837                                         | 1.148E12                                      |
| Black creek canal virus                           | Chemical synthesis | L39949                                                     | 1394               | 791                                         | 1.004E12                                      |
| Andes virus                                       | Chemical synthesis | NC_003466                                                  | 1287               | 1026                                        | 1.411E12                                      |
| Sin nombre virus                                  | Chemical synthesis | NC_005216.1                                                | 1287               | 418                                         | 5.749E11                                      |
| Crimean-Congo hemorrhagic fever virus             | Chemical synthesis | NC_005302                                                  | 1449               | 801                                         | 9.784E11                                      |
| Rift Valley fever virus                           | Chemical synthesis | NC_014395                                                  | 738                | 867                                         | 2.079E12                                      |
| Severe fever with thrombocytopenia syndrome virus | Virus isolate      | NC_018137.1                                                | 738                | 1120                                        | 2.686E12                                      |
| Heartland virus                                   | Chemical synthesis | JX005842.1                                                 | 738                | 951                                         | 2.280E12                                      |
| Omsk hemorrhagic fever virus                      | Chemical synthesis | NC_005062                                                  | 966                | 820                                         | 1.502E12                                      |
| Kyasanur forest disease virus                     | Chemical synthesis | NC_004355                                                  | 2709               | 381                                         | 2.489E11                                      |
| Dengue virus type 2                               | Virus isolate      | AF204178.1                                                 | 967                | 856                                         | 1.567E12                                      |
| Yellow fever virus                                | Virus isolate      | X03700.1                                                   | 1011               | 896                                         | 1.569E12                                      |
| Marburg virus                                     | Chemical synthesis | NC_001608                                                  | 2796               | 737                                         | 4.666E11                                      |
| Ebola Zaire virus                                 | Chemical synthesis | NC_002549                                                  | 2965               | 646                                         | 3.856E11                                      |
| Ebola Sudan virus                                 | Chemical synthesis | NC_006432                                                  | 2965               | 432                                         | 2.579E11                                      |
| Ebola Cote d'Ivoire virus                         | Chemical synthesis | NC_014372                                                  | 2965               | 695                                         | 4.149E11                                      |
| Junin virus                                       | Chemical synthesis | NC_005081                                                  | 714                | 200                                         | 4.958E11                                      |
| Machupo virus                                     | Chemical synthesis | NC_005078                                                  | 1491               | 729                                         | 8.654E11                                      |
| Guanarito virus                                   | Chemical synthesis | NC_005077                                                  | 1440               | 322                                         | 3.958E11                                      |
| Sabia virus                                       | Chemical synthesis | NC_006317                                                  | 1467               | 211                                         | 2.546E11                                      |
| Chapare virus                                     | Chemical synthesis | NC_010562                                                  | 1455               | 722                                         | 8.783E11                                      |
| Lassa virus                                       | Chemical synthesis | NC_004296                                                  | 1476               | 712                                         | 8.538E11                                      |
| Lujo virus                                        | Chemical synthesis | NC_012776                                                  | 1365               | 315                                         | 4.085E11                                      |
| Bas-Congo virus                                   | Chemical synthesis | JX297815                                                   | 1224               | 1388                                        | 1.912E12                                      |
