# Supplementary material for: Comprehensive Multiplex One-Step Real-Time TaqMan qRT-PCR Assays for Detection and Quantification of Hemorrhagic Fever Viruses
Source: PubMed Central journal article supplement (PMC3994070; doi:10.1371/journal.pone.0095635), 2014-04-21
Supplement: pone.0095635.s004.pdf [file pone.0095635.s004.pdf]

**Table S3. Reproducibility analysis of multiplex one-step real-time RT-PCR assays**

| Assay                     | RNA transcripts           | RNA transcripts concentration | Mean Ct value | Intra-assay CV (%) | Inter-assay CV (%) |
|---------------------------|---------------------------|-------------------------------|---------------|--------------------|--------------------|
| Group A                   | HTNV                      | 10 <sup>8</sup> copies/μl     | 13.54         | 3.41               | 1.96               |
|                           |                           | 10 <sup>7</sup> copies/μl     | 16.70         | 2.01               | 2.17               |
|                           |                           | 10 <sup>6</sup> copies/μl     | 20.04         | 1.59               | 1.22               |
|                           |                           | 10 <sup>5</sup> copies/μl     | 23.24         | 0.51               | 1.05               |
|                           |                           | 10 <sup>4</sup> copies/μl     | 26.57         | 0.30               | 1.29               |
|                           |                           | 10 <sup>3</sup> copies/μl     | 30.23         | 0.73               | 0.53               |
|                           |                           | 10 <sup>2</sup> copies/μl     | 33.53         | 0.56               | 0.67               |
|                           |                           | 10 <sup>1</sup> copies/μl     | 36.29         | 0.45               | 0.70               |
|                           | SEOV                      | 10 <sup>8</sup> copies/μl     | 10.72         | 4.68               | 4.81               |
|                           |                           | 10 <sup>7</sup> copies/μl     | 14.37         | 0.56               | 3.28               |
|                           |                           | 10 <sup>6</sup> copies/μl     | 17.78         | 0.82               | 1.47               |
|                           |                           | 10 <sup>5</sup> copies/μl     | 21.33         | 0.40               | 1.30               |
|                           |                           | 10 <sup>4</sup> copies/μl     | 24.71         | 0.71               | 0.95               |
|                           |                           | 10 <sup>3</sup> copies/μl     | 28.30         | 0.16               | 0.50               |
|                           |                           | 10 <sup>2</sup> copies/μl     | 31.79         | 0.11               | 0.14               |
|                           |                           | 10 <sup>1</sup> copies/μl     | 35.21         | 2.76               | 1.69               |
|                           | PUUV                      | 10 <sup>8</sup> copies/μl     | 10.82         | 1.52               | 4.46               |
|                           |                           | 10 <sup>7</sup> copies/μl     | 14.68         | 0.21               | 3.30               |
|                           |                           | 10 <sup>6</sup> copies/μl     | 18.11         | 0.58               | 2.77               |
|                           |                           | 10 <sup>5</sup> copies/μl     | 21.47         | 0.44               | 0.69               |
|                           |                           | 10 <sup>4</sup> copies/μl     | 25.44         | 0.59               | 1.70               |
|                           |                           | 10 <sup>3</sup> copies/μl     | 29.08         | 0.51               | 1.60               |
|                           |                           | 10 <sup>2</sup> copies/μl     | 32.48         | 0.48               | 0.81               |
|                           |                           | 10 <sup>1</sup> copies/μl     | 35.96         | 0.66               | 0.49               |
|                           | DOBV                      | 10 <sup>8</sup> copies/μl     | 10.28         | 0.59               | 0.59               |
|                           |                           | 10 <sup>7</sup> copies/μl     | 13.94         | 2.74               | 2.74               |
|                           |                           | 10 <sup>6</sup> copies/μl     | 17.60         | 0.73               | 0.73               |
|                           |                           | 10 <sup>5</sup> copies/μl     | 21.17         | 0.37               | 0.37               |
| 10 <sup>4</sup> copies/μl |                           | 24.71                         | 0.14          | 0.14               |                    |
| 10 <sup>3</sup> copies/μl |                           | 28.26                         | 0.52          | 0.52               |                    |
| 10 <sup>2</sup> copies/μl |                           | 32.01                         | 0.17          | 0.17               |                    |
| 10 <sup>1</sup> copies/μl |                           | 35.07                         | 1.86          | 1.86               |                    |
| Group B                   | TULV                      | 10 <sup>8</sup> copies/μl     | 12.17         | 1.27               | 2.87               |
|                           |                           | 10 <sup>7</sup> copies/μl     | 15.78         | 1.64               | 1.39               |
|                           |                           | 10 <sup>6</sup> copies/μl     | 19.4          | 1.72               | 0.73               |
|                           |                           | 10 <sup>5</sup> copies/μl     | 22.75         | 1.32               | 0.79               |
|                           |                           | 10 <sup>4</sup> copies/μl     | 26.34         | 0.68               | 1.17               |
|                           |                           | 10 <sup>3</sup> copies/μl     | 29.87         | 0.06               | 1.52               |
|                           |                           | 10 <sup>2</sup> copies/μl     | 33.28         | 0.45               | 1.94               |
|                           |                           | 10 <sup>1</sup> copies/μl     | 36.39         | 0.75               | 0.24               |
|                           | BCCV                      | 10 <sup>8</sup> copies/μl     | 10.17         | 0.98               | 2.82               |
|                           |                           | 10 <sup>7</sup> copies/μl     | 14.05         | 4.06               | 3.08               |
|                           |                           | 10 <sup>6</sup> copies/μl     | 17.88         | 0.90               | 1.97               |
|                           |                           | 10 <sup>5</sup> copies/μl     | 21.41         | 0.68               | 1.03               |
|                           |                           | 10 <sup>4</sup> copies/μl     | 25.18         | 0.81               | 2.15               |
|                           |                           | 10 <sup>3</sup> copies/μl     | 28.54         | 0.35               | 1.31               |
|                           |                           | 10 <sup>2</sup> copies/μl     | 32.13         | 1.15               | 0.79               |
|                           |                           | 10 <sup>1</sup> copies/μl     | 35.80         | 2.61               | 1.45               |
| ANDV                      | 10 <sup>8</sup> copies/μl | 11.89                         | 3.79          | 2.20               |                    |
|                           | 10 <sup>7</sup> copies/μl | 15.36                         | 0.37          | 1.16               |                    |
|                           | 10 <sup>6</sup> copies/μl | 18.98                         | 0.21          | 0.14               |                    |
|                           | 10 <sup>5</sup> copies/μl | 22.54                         | 0.95          | 1.85               |                    |
|                           | 10 <sup>4</sup> copies/μl | 26.10                         | 0.19          | 0.59               |                    |
|                           | 10 <sup>3</sup> copies/μl | 29.32                         | 0.17          | 0.75               |                    |
|                           | 10 <sup>2</sup> copies/μl | 32.7                          | 1.69          | 2.10               |                    |
|                           | 10 <sup>1</sup> copies/μl | 37.12                         | 1.82          | 1.06               |                    |

|                           |                           |                           |       |      |       |
|---------------------------|---------------------------|---------------------------|-------|------|-------|
| Group C                   | SINV                      | 10 <sup>8</sup> copies/μl | 11.48 | 3.79 | 4.51  |
|                           |                           | 10 <sup>7</sup> copies/μl | 15.24 | 0.37 | 1.01  |
|                           |                           | 10 <sup>6</sup> copies/μl | 19.02 | 0.21 | 0.105 |
|                           |                           | 10 <sup>5</sup> copies/μl | 22.48 | 0.95 | 1.31  |
|                           |                           | 10 <sup>4</sup> copies/μl | 26.02 | 0.19 | 0.43  |
|                           |                           | 10 <sup>3</sup> copies/μl | 29.20 | 0.17 | 0.57  |
|                           |                           | 10 <sup>2</sup> copies/μl | 32.36 | 1.69 | 1.70  |
|                           |                           | 10 <sup>1</sup> copies/μl | 36.87 | 1.82 | 1.34  |
|                           | CCHFV                     | 10 <sup>8</sup> copies/μl | 10.80 | 4.84 | 3.48  |
|                           |                           | 10 <sup>7</sup> copies/μl | 14.87 | 3.14 | 2.86  |
|                           |                           | 10 <sup>6</sup> copies/μl | 18.25 | 0.25 | 1.02  |
|                           |                           | 10 <sup>5</sup> copies/μl | 21.97 | 0.66 | 0.45  |
|                           |                           | 10 <sup>4</sup> copies/μl | 25.64 | 1.81 | 2.07  |
|                           |                           | 10 <sup>3</sup> copies/μl | 29.25 | 1.75 | 0.86  |
|                           |                           | 10 <sup>2</sup> copies/μl | 32.76 | 1.03 | 0.08  |
|                           |                           | 10 <sup>1</sup> copies/μl | 36.64 | 1.93 | 0.70  |
|                           | RVFV                      | 10 <sup>8</sup> copies/μl | 10.32 | 3.49 | 4.52  |
|                           |                           | 10 <sup>7</sup> copies/μl | 15.58 | 0.56 | 1.69  |
|                           |                           | 10 <sup>6</sup> copies/μl | 19.23 | 1.70 | 2.97  |
|                           |                           | 10 <sup>5</sup> copies/μl | 22.61 | 1.56 | 2.57  |
|                           |                           | 10 <sup>4</sup> copies/μl | 26.32 | 0.66 | 1.36  |
|                           |                           | 10 <sup>3</sup> copies/μl | 29.93 | 0.30 | 0.84  |
|                           |                           | 10 <sup>2</sup> copies/μl | 33.56 | 1.23 | 1.39  |
|                           |                           | 10 <sup>1</sup> copies/μl | 36.72 | 1.07 | 0.52  |
|                           | SFTSV                     | 10 <sup>8</sup> copies/μl | 11.06 | 1.64 | 2.17  |
|                           |                           | 10 <sup>7</sup> copies/μl | 14.95 | 0.77 | 1.11  |
|                           |                           | 10 <sup>6</sup> copies/μl | 18.7  | 1.63 | 1.37  |
|                           |                           | 10 <sup>5</sup> copies/μl | 22.16 | 0.71 | 0.69  |
| 10 <sup>4</sup> copies/μl |                           | 26.09                     | 0.03  | 0.16 |       |
| 10 <sup>3</sup> copies/μl |                           | 29.62                     | 0.23  | 0.58 |       |
| 10 <sup>2</sup> copies/μl |                           | 32.89                     | 0.54  | 0.41 |       |
| 10 <sup>1</sup> copies/μl |                           | 35.96                     | 1.50  | 0.18 |       |
| HLV                       | 10 <sup>8</sup> copies/μl | 9.86                      | 0.20  | 0.71 |       |
|                           | 10 <sup>7</sup> copies/μl | 14.08                     | 2.82  | 3.00 |       |
|                           | 10 <sup>6</sup> copies/μl | 17.42                     | 0.21  | 3.87 |       |
|                           | 10 <sup>5</sup> copies/μl | 21.22                     | 0.34  | 2.84 |       |
|                           | 10 <sup>4</sup> copies/μl | 25.08                     | 0.16  | 1.80 |       |
|                           | 10 <sup>3</sup> copies/μl | 28.86                     | 0.52  | 1.21 |       |
|                           | 10 <sup>2</sup> copies/μl | 32.5                      | 0.16  | 1.37 |       |
|                           | 10 <sup>1</sup> copies/μl | 36.14                     | 1.18  | 0.34 |       |
| Group D                   | OHFV                      | 10 <sup>8</sup> copies/μl | 10.98 | 1.95 | 0.44  |
|                           |                           | 10 <sup>7</sup> copies/μl | 14.61 | 0.91 | 2.66  |
|                           |                           | 10 <sup>6</sup> copies/μl | 18.21 | 0.43 | 3.27  |
|                           |                           | 10 <sup>5</sup> copies/μl | 21.80 | 0.31 | 2.10  |
|                           |                           | 10 <sup>4</sup> copies/μl | 25.31 | 0.40 | 2.41  |
|                           |                           | 10 <sup>3</sup> copies/μl | 28.96 | 0.32 | 1.11  |
|                           |                           | 10 <sup>2</sup> copies/μl | 32.28 | 0.43 | 1.63  |
|                           |                           | 10 <sup>1</sup> copies/μl | 35.86 | 1.05 | 0.51  |
|                           | KFDV                      | 10 <sup>8</sup> copies/μl | 11.54 | 2.37 | 0.30  |
|                           |                           | 10 <sup>7</sup> copies/μl | 15.13 | 0.33 | 0.87  |
|                           |                           | 10 <sup>6</sup> copies/μl | 18.72 | 0.93 | 1.48  |
|                           |                           | 10 <sup>5</sup> copies/μl | 22.1  | 0.09 | 1.04  |
|                           |                           | 10 <sup>4</sup> copies/μl | 25.42 | 0.27 | 2.11  |
|                           |                           | 10 <sup>3</sup> copies/μl | 28.6  | 0.19 | 2.41  |
|                           |                           | 10 <sup>2</sup> copies/μl | 31.21 | 0.46 | 1.73  |
|                           |                           | 10 <sup>1</sup> copies/μl | 35.03 | 3.01 | 3.02  |
| DENV                      | 10 <sup>8</sup> copies/μl | 11.50                     | 3.66  | 4.65 |       |
|                           | 10 <sup>7</sup> copies/μl | 15.28                     | 0.26  | 1.91 |       |
|                           | 10 <sup>6</sup> copies/μl | 18.70                     | 0.64  | 1.81 |       |
|                           | 10 <sup>5</sup> copies/μl | 22.28                     | 0.10  | 1.07 |       |
|                           | 10 <sup>4</sup> copies/μl | 25.99                     | 0.25  | 1.13 |       |
|                           | 10 <sup>3</sup> copies/μl | 29.46                     | 0.21  | 1.14 |       |
|                           | 10 <sup>2</sup> copies/μl | 33.00                     | 0.33  | 0.88 |       |
|                           | 10 <sup>1</sup> copies/μl | 36.15                     | 1.10  | 1.05 |       |

|                           |                           |                           |       |       |      |
|---------------------------|---------------------------|---------------------------|-------|-------|------|
| Group E                   | YFV                       | 10 <sup>8</sup> copies/μl | 10.72 | 2.84  | 3.11 |
|                           |                           | 10 <sup>7</sup> copies/μl | 14.35 | 2.49  | 2.36 |
|                           |                           | 10 <sup>6</sup> copies/μl | 17.70 | 1.40  | 1.53 |
|                           |                           | 10 <sup>5</sup> copies/μl | 20.61 | 0.97  | 2.60 |
|                           |                           | 10 <sup>4</sup> copies/μl | 23.96 | 0.50  | 2.88 |
|                           |                           | 10 <sup>3</sup> copies/μl | 27.67 | 0.71  | 2.45 |
|                           |                           | 10 <sup>2</sup> copies/μl | 31.19 | 0.18  | 1.80 |
|                           |                           | 10 <sup>1</sup> copies/μl | 34.65 | 1.34  | 1.66 |
|                           | MARV                      | 10 <sup>8</sup> copies/μl | 10.28 | 2.81  | 3.48 |
|                           |                           | 10 <sup>7</sup> copies/μl | 14.27 | 1.54  | 1.07 |
|                           |                           | 10 <sup>6</sup> copies/μl | 17.76 | 1.056 | 1.83 |
|                           |                           | 10 <sup>5</sup> copies/μl | 21.29 | 1.08  | 0.99 |
|                           |                           | 10 <sup>4</sup> copies/μl | 24.88 | 0.39  | 1.41 |
|                           |                           | 10 <sup>3</sup> copies/μl | 28.45 | 0.24  | 0.92 |
|                           |                           | 10 <sup>2</sup> copies/μl | 31.70 | 0.50  | 1.03 |
|                           |                           | 10 <sup>1</sup> copies/μl | 34.97 | 0.35  | 1.33 |
|                           | ZEBOV                     | 10 <sup>8</sup> copies/μl | 10.75 | 3.48  | 3.17 |
|                           |                           | 10 <sup>7</sup> copies/μl | 15.31 | 0.28  | 4.58 |
|                           |                           | 10 <sup>6</sup> copies/μl | 18.80 | 0.26  | 3.26 |
|                           |                           | 10 <sup>5</sup> copies/μl | 22.47 | 0.45  | 2.57 |
|                           |                           | 10 <sup>4</sup> copies/μl | 25.97 | 0.23  | 2.17 |
|                           |                           | 10 <sup>3</sup> copies/μl | 29.36 | 0.33  | 1.49 |
|                           |                           | 10 <sup>2</sup> copies/μl | 32.91 | 0.32  | 1.33 |
|                           |                           | 10 <sup>1</sup> copies/μl | 36.48 | 2.34  | 2.26 |
|                           | SEBOV                     | 10 <sup>8</sup> copies/μl | 10.02 | 0.51  | 0.63 |
|                           |                           | 10 <sup>7</sup> copies/μl | 13.77 | 0.63  | 1.40 |
|                           |                           | 10 <sup>6</sup> copies/μl | 17.34 | 0.30  | 2.09 |
|                           |                           | 10 <sup>5</sup> copies/μl | 20.88 | 0.72  | 1.17 |
| 10 <sup>4</sup> copies/μl |                           | 24.39                     | 0.49  | 2.39  |      |
| 10 <sup>3</sup> copies/μl |                           | 27.85                     | 0.26  | 3.23  |      |
| 10 <sup>2</sup> copies/μl |                           | 31.34                     | 0.37  | 2.34  |      |
| 10 <sup>1</sup> copies/μl |                           | 34.77                     | 0.62  | 1.71  |      |
| CEBOV                     | 10 <sup>8</sup> copies/μl | 10.31                     | 3.22  | 3.03  |      |
|                           | 10 <sup>7</sup> copies/μl | 14.27                     | 0.97  | 0.48  |      |
|                           | 10 <sup>6</sup> copies/μl | 17.79                     | 0.31  | 0.847 |      |
|                           | 10 <sup>5</sup> copies/μl | 21.18                     | 0.20  | 1.15  |      |
|                           | 10 <sup>4</sup> copies/μl | 24.95                     | 0.34  | 0.34  |      |
|                           | 10 <sup>3</sup> copies/μl | 28.24                     | 0.45  | 0.91  |      |
|                           | 10 <sup>2</sup> copies/μl | 31.46                     | 1.06  | 1.42  |      |
|                           | 10 <sup>1</sup> copies/μl | 34.97                     | 0.80  | 0.84  |      |
| Group F                   | JUNV                      | 10 <sup>8</sup> copies/μl | 11.59 | 1.91  | 4.41 |
|                           |                           | 10 <sup>7</sup> copies/μl | 15.03 | 0.29  | 2.91 |
|                           |                           | 10 <sup>6</sup> copies/μl | 18.78 | 1.16  | 2.29 |
|                           |                           | 10 <sup>5</sup> copies/μl | 22.15 | 0.63  | 0.73 |
|                           |                           | 10 <sup>4</sup> copies/μl | 25.48 | 0.10  | 0.08 |
|                           |                           | 10 <sup>3</sup> copies/μl | 29.12 | 0.29  | 0.46 |
|                           |                           | 10 <sup>2</sup> copies/μl | 32.87 | 0.36  | 0.46 |
|                           |                           | 10 <sup>1</sup> copies/μl | 36.61 | 1.31  | 2.01 |
|                           | MACV                      | 10 <sup>8</sup> copies/μl | 10.28 | 0.90  | 3.80 |
|                           |                           | 10 <sup>7</sup> copies/μl | 14.04 | 0.33  | 0.50 |
|                           |                           | 10 <sup>6</sup> copies/μl | 17.47 | 0.72  | 0.49 |
|                           |                           | 10 <sup>5</sup> copies/μl | 20.91 | 1.22  | 1.31 |
|                           |                           | 10 <sup>4</sup> copies/μl | 24.37 | 1.21  | 2.21 |
|                           |                           | 10 <sup>3</sup> copies/μl | 28.01 | 0.72  | 0.75 |
|                           |                           | 10 <sup>2</sup> copies/μl | 31.66 | 0.63  | 0.53 |
|                           |                           | 10 <sup>1</sup> copies/μl | 35.33 | 1.73  | 1.69 |
| GTOV                      | 10 <sup>8</sup> copies/μl | 10.64                     | 0.85  | 1.80  |      |
|                           | 10 <sup>7</sup> copies/μl | 14.65                     | 0.75  | 0.76  |      |
|                           | 10 <sup>6</sup> copies/μl | 17.84                     | 1.70  | 2.47  |      |
|                           | 10 <sup>5</sup> copies/μl | 21.57                     | 1.01  | 2.02  |      |
|                           | 10 <sup>4</sup> copies/μl | 25.26                     | 0.38  | 2.17  |      |
|                           | 10 <sup>3</sup> copies/μl | 28.69                     | 0.55  | 1.93  |      |
|                           | 10 <sup>2</sup> copies/μl | 32.37                     | 0.36  | 1.27  |      |
| 10 <sup>1</sup> copies/μl | 35.55                     | 2.10                      | 1.88  |       |      |

|                           |                           |                           |       |      |      |
|---------------------------|---------------------------|---------------------------|-------|------|------|
| Group G                   | SABV                      | 10 <sup>8</sup> copies/μl | 10.64 | 1.85 | 3.03 |
|                           |                           | 10 <sup>7</sup> copies/μl | 14.42 | 0.60 | 2.52 |
|                           |                           | 10 <sup>6</sup> copies/μl | 17.98 | 0.64 | 0.07 |
|                           |                           | 10 <sup>5</sup> copies/μl | 21.44 | 1.15 | 0.76 |
|                           |                           | 10 <sup>4</sup> copies/μl | 25.05 | 0.08 | 0.70 |
|                           |                           | 10 <sup>3</sup> copies/μl | 28.57 | 0.43 | 1.13 |
|                           |                           | 10 <sup>2</sup> copies/μl | 32.11 | 0.31 | 0.74 |
|                           |                           | 10 <sup>1</sup> copies/μl | 34.99 | 1.76 | 0.87 |
|                           | CHAV                      | 10 <sup>8</sup> copies/μl | 11.13 | 2.20 | 4.52 |
|                           |                           | 10 <sup>7</sup> copies/μl | 14.64 | 0.45 | 2.89 |
|                           |                           | 10 <sup>6</sup> copies/μl | 18.28 | 0.35 | 1.89 |
|                           |                           | 10 <sup>5</sup> copies/μl | 21.71 | 0.34 | 0.96 |
|                           |                           | 10 <sup>4</sup> copies/μl | 25.39 | 0.06 | 0.86 |
|                           |                           | 10 <sup>3</sup> copies/μl | 28.95 | 0.19 | 1.13 |
|                           |                           | 10 <sup>2</sup> copies/μl | 32.31 | 0.60 | 1.26 |
|                           |                           | 10 <sup>1</sup> copies/μl | 35.87 | 1.10 | 1.44 |
|                           | LASV                      | 10 <sup>8</sup> copies/μl | 10.93 | 3.97 | 4.53 |
|                           |                           | 10 <sup>7</sup> copies/μl | 14.62 | 1.22 | 1.08 |
|                           |                           | 10 <sup>6</sup> copies/μl | 18.29 | 0.13 | 0.32 |
|                           |                           | 10 <sup>5</sup> copies/μl | 21.48 | 0.51 | 0.99 |
|                           |                           | 10 <sup>4</sup> copies/μl | 24.77 | 0.62 | 1.18 |
|                           |                           | 10 <sup>3</sup> copies/μl | 28.22 | 0.24 | 1.69 |
|                           |                           | 10 <sup>2</sup> copies/μl | 31.59 | 0.58 | 2.03 |
|                           |                           | 10 <sup>1</sup> copies/μl | 34.88 | 0.64 | 2.59 |
|                           | LUJV                      | 10 <sup>8</sup> copies/μl | 10.63 | 3.90 | 2.87 |
|                           |                           | 10 <sup>7</sup> copies/μl | 14.89 | 4.38 | 4.10 |
|                           |                           | 10 <sup>6</sup> copies/μl | 17.84 | 1.69 | 2.15 |
|                           |                           | 10 <sup>5</sup> copies/μl | 21.52 | 1.22 | 1.71 |
| 10 <sup>4</sup> copies/μl |                           | 25.44                     | 2.09  | 2.08 |      |
| 10 <sup>3</sup> copies/μl |                           | 28.71                     | 0.76  | 0.85 |      |
| 10 <sup>2</sup> copies/μl |                           | 32.13                     | 2.31  | 1.26 |      |
| 10 <sup>1</sup> copies/μl |                           | 35.44                     | 1.46  | 0.44 |      |
| BASV                      | 10 <sup>8</sup> copies/μl | 11.83                     | 0.63  | 4.98 |      |
|                           | 10 <sup>7</sup> copies/μl | 15.22                     | 0.42  | 3.72 |      |
|                           | 10 <sup>6</sup> copies/μl | 18.87                     | 0.55  | 2.49 |      |
|                           | 10 <sup>5</sup> copies/μl | 22.61                     | 1.02  | 2.41 |      |
|                           | 10 <sup>4</sup> copies/μl | 26.08                     | 0.23  | 1.97 |      |
|                           | 10 <sup>3</sup> copies/μl | 29.73                     | 1.47  | 1.98 |      |
|                           | 10 <sup>2</sup> copies/μl | 33.21                     | 0.69  | 0.75 |      |
|                           | 10 <sup>1</sup> copies/μl | 36.62                     | 1.70  | 1.90 |      |

CV, coefficient of variation.

Intra-assays were determined from three replicates within each dilution.

Inter-assays were determined from three independent assays performed on different days.
